# Supplementary material for: Water Extract of Mixed Mushroom Mycelia Grown on a Solid Barley Medium Is Protective against Experimental Focal Cerebral Ischemia
Source: MDPI journal article supplement (doi:10.3390/cimb43010030), 2021-06-15
Supplement: s1 [file s1]

Supplementary Table S1. List of the antibodies and other reagents.

| Antibodies                                 |             |                     |             |
|--------------------------------------------|-------------|---------------------|-------------|
| Product                                    | application | Supplier            | Catalogue # |
| Rabbit Cleaved caspase-3 (Asp175) antibody | IHC         | Cell signaling      | 9661s       |
| Rabbit (DA1E) mAB IgG XP Isotype Control   | IHC         | Cell signaling      | 3900s       |
| Goat anti-rabbit IgG, biotinylated         | IHC         | Vector laboratories | BA-1000-1.5 |
| Rabbit Superoxide dismutase (SOD) antibody | WB          | Sigma-Aldrich       | S5569       |
| Rabbit Heme oxygenase-1 (HO-1) antibody    | WB          | Abcam               | Ab68477     |
| Rabbit Catalase (CAT) antibody             | WB          | Sigma-Aldrich       | 219010      |
| Mouse $\beta$ -actin antibody              | WB          | Santa Cruz          | SC-47778    |
| Goat anti-Mouse IgG, HRP                   | WB          | Invitrogen          | 31430       |
| Goat anti-Rabbit IgG, HRP                  | WB          | Invitrogen          | 31460       |

| Other Reagents                                                      |                         |                     |             |
|---------------------------------------------------------------------|-------------------------|---------------------|-------------|
| Product                                                             | application             | Supplier            | Catalogue # |
| Pierce™ BCA Protein Assay Kit                                       | WB                      | Thermo-Fisher       | 23227       |
| Hoechst33258                                                        | Histofluorescence       | Sigma-Aldrich       | 861405      |
| 2', 7'-dichlorodihydrofluorescein diacetate (DCF-DA)                | ROS ( <i>in vitro</i> ) | Sigma-Aldrich       | D6883       |
| 3-(4,5-dimethylthiazol-2-yl)-2,5-diphenyl tetrazolium bromide (MTT) | Cell viability          | Sigma-Aldrich       | M2128       |
| Annexin V-FITC Apoptosis Detection Kit                              | Apoptosis               | Merck-Millipore     | CBA059      |
| TUNEL assay Kit                                                     | Apoptosis               | Promega             | G3250       |
| Triphenyltetrazolium chloride (TTC)                                 | Infarction size         | Sigma-Aldrich       | T8877       |
| Cresyl-violet acetate (C-V)                                         | Neuron count            | Sigma-Aldrich       | C5042       |
| VECTASTAIN® ABC Kits                                                | IHC                     | Vector laboratories | PK6100      |
| 3,3'-Diaminobenzidine (DAB)                                         | IHC                     | Vector laboratories | SK4100      |
| Dihydroethidium (DHE)                                               | ROS ( <i>in vivo</i> )  | Invitrogen          | D1168       |
